# Supplementary material for: The effect of ice rheology on shelf edge bending
Source: Copernicus journal article supplement (doi:10.5194/egusphere-2024-557), 2024-03-18

To replace Figure 3 (b) and (c)

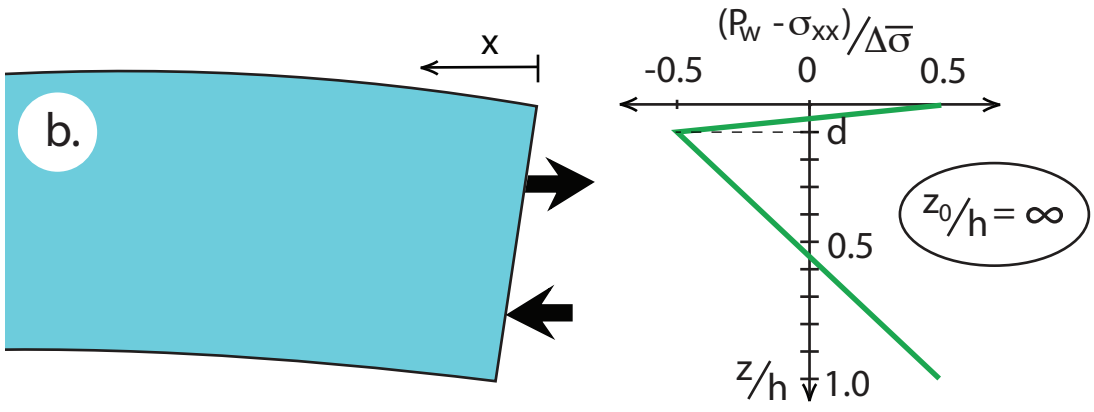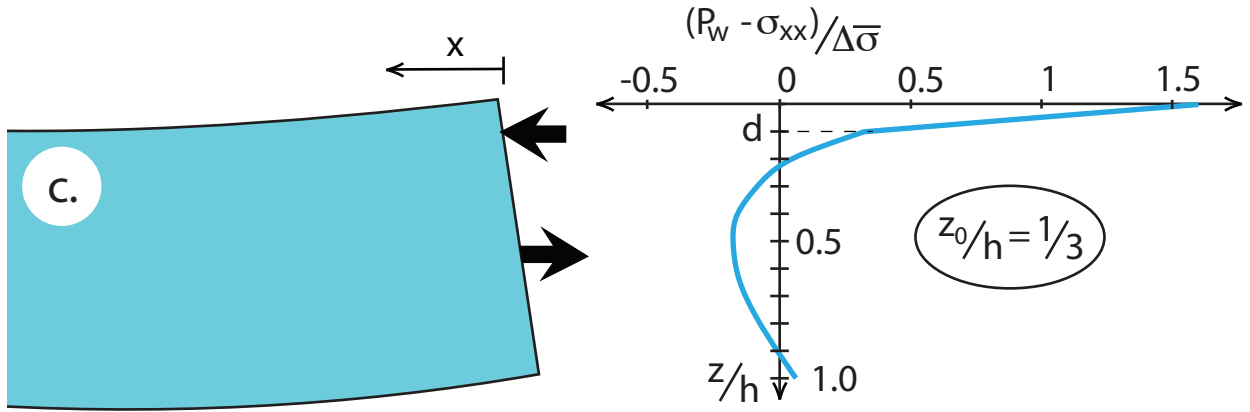

Supplement: Supplementary file [file egusphere-2024-557-AC3-supplement.pdf]
